# Supplementary figures and images for: Key Roles of Dipterocarpaceae, Bark Type Diversity and Tree Size in Lowland Rainforests of Northeast Borneo—Using Functional Traits of Lichens to Distinguish Plots of Old Growth and Regenerating Logged Forests
Source: MDPI journal article supplement (doi:10.3390/microorganisms9030541), 2021-03-05

(b)

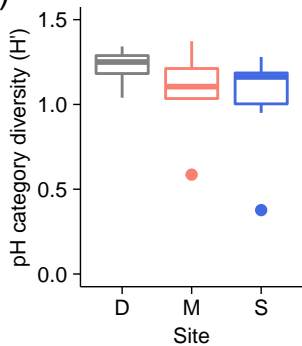

(d)

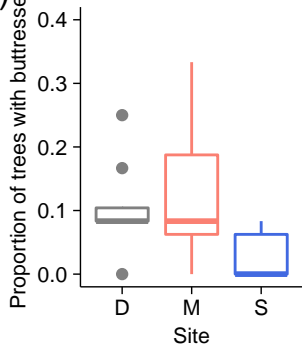

(e)

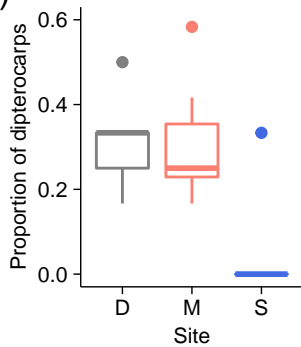

Supplement: s1 [file s1]
